# Supplementary material
Source: Preprints.org preprint supplement (doi:10.20944/preprints201903.0178.v1)
Supplement: Supplementary file 1 [file supplementary]

Colombo et al.: Optimizing school food supply: integrating environmental, health, economic, and cultural dimensions of diet sustainability with linear programming

**Supplementary Table S3.** Summary of the RD for individual food items when minimizing TRD while applying constraints on nutritional adequacy and relative GHGE reductions where the RD of each individual food was allowed to decrease by a maximum of 75% and increase by a maximum of 200% (Model 3, CRDmin).


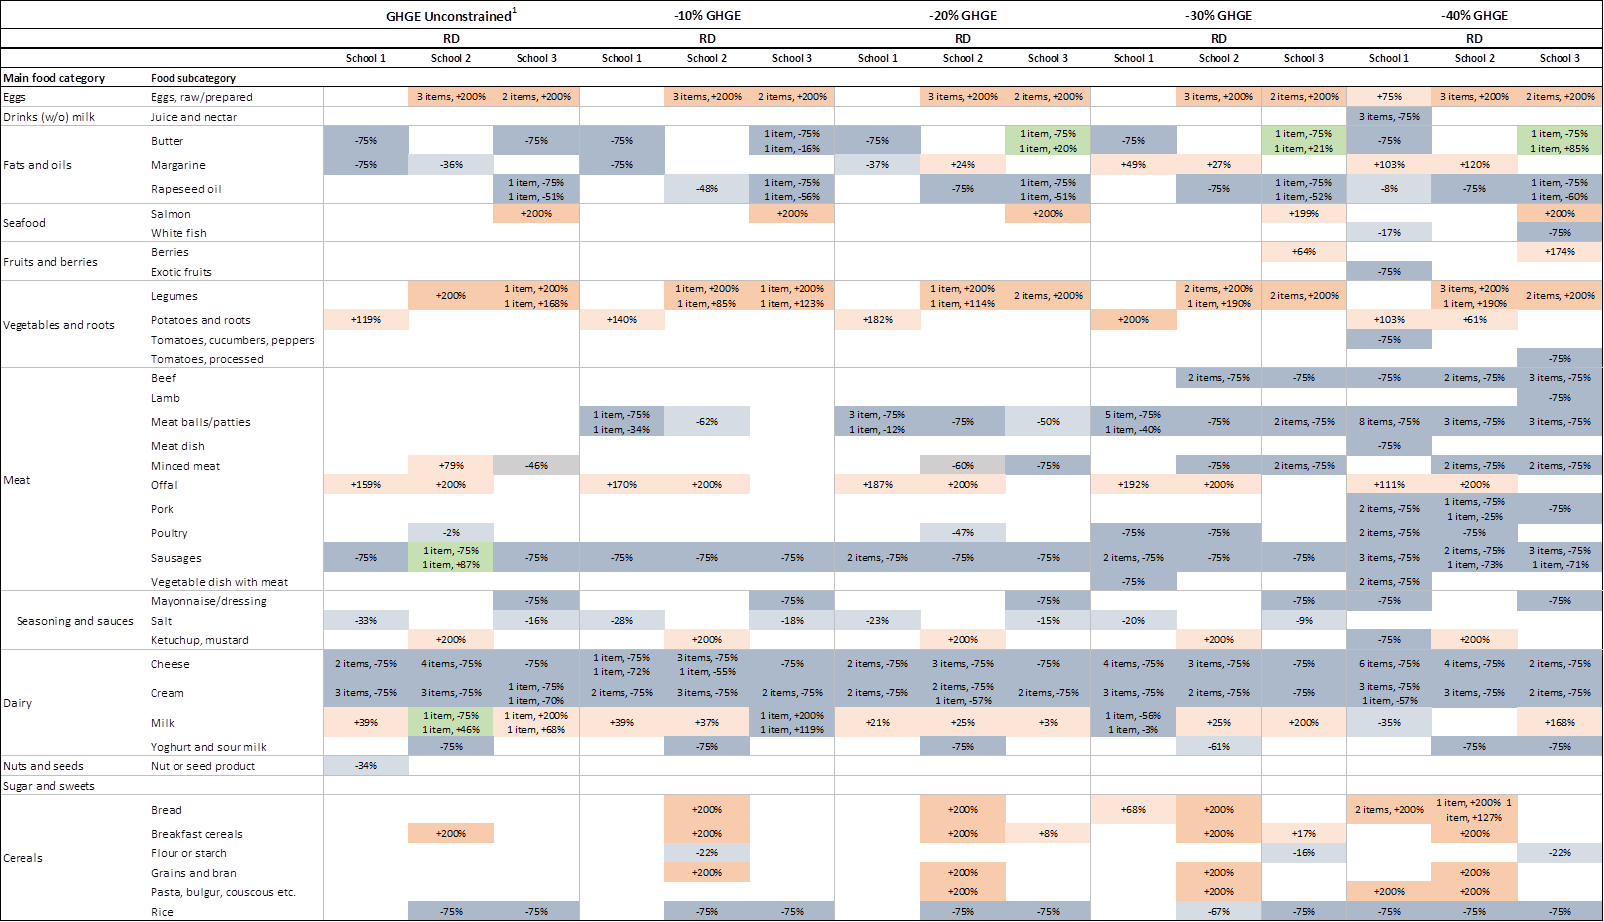


1 No constraint on maximum allowed amount of GHGE (CO2eq) per meal.

| 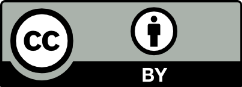 | © 2019 by the authors. Submitted for possible open access publication under the terms and conditions of the Creative Commons Attribution (CC BY) license (http://creativecommons.org/licenses/by/4.0/). |
| --- | --- |
