# Supplementary material
Source: Preprints.org preprint supplement (doi:10.20944/preprints201903.0178.v1)
Supplement: Supplementary file 4 [file Climate-friendly Swedish School Meals - IJERPH TS2.docx]

Colombo et al.: Optimizing school food supply: integrating environmental, health, economic, and cultural dimensions of diet sustainability with linear programming

**Supplementary Table S2.** Summary of the relative deviations of individual food items when minimizing the total relative deviation (TRD) from observed food supply while applying constraints on nutritional adequacy (Supplementary Table S2 and step-wise relative GHGE reductions (Model 2, TRDmin).


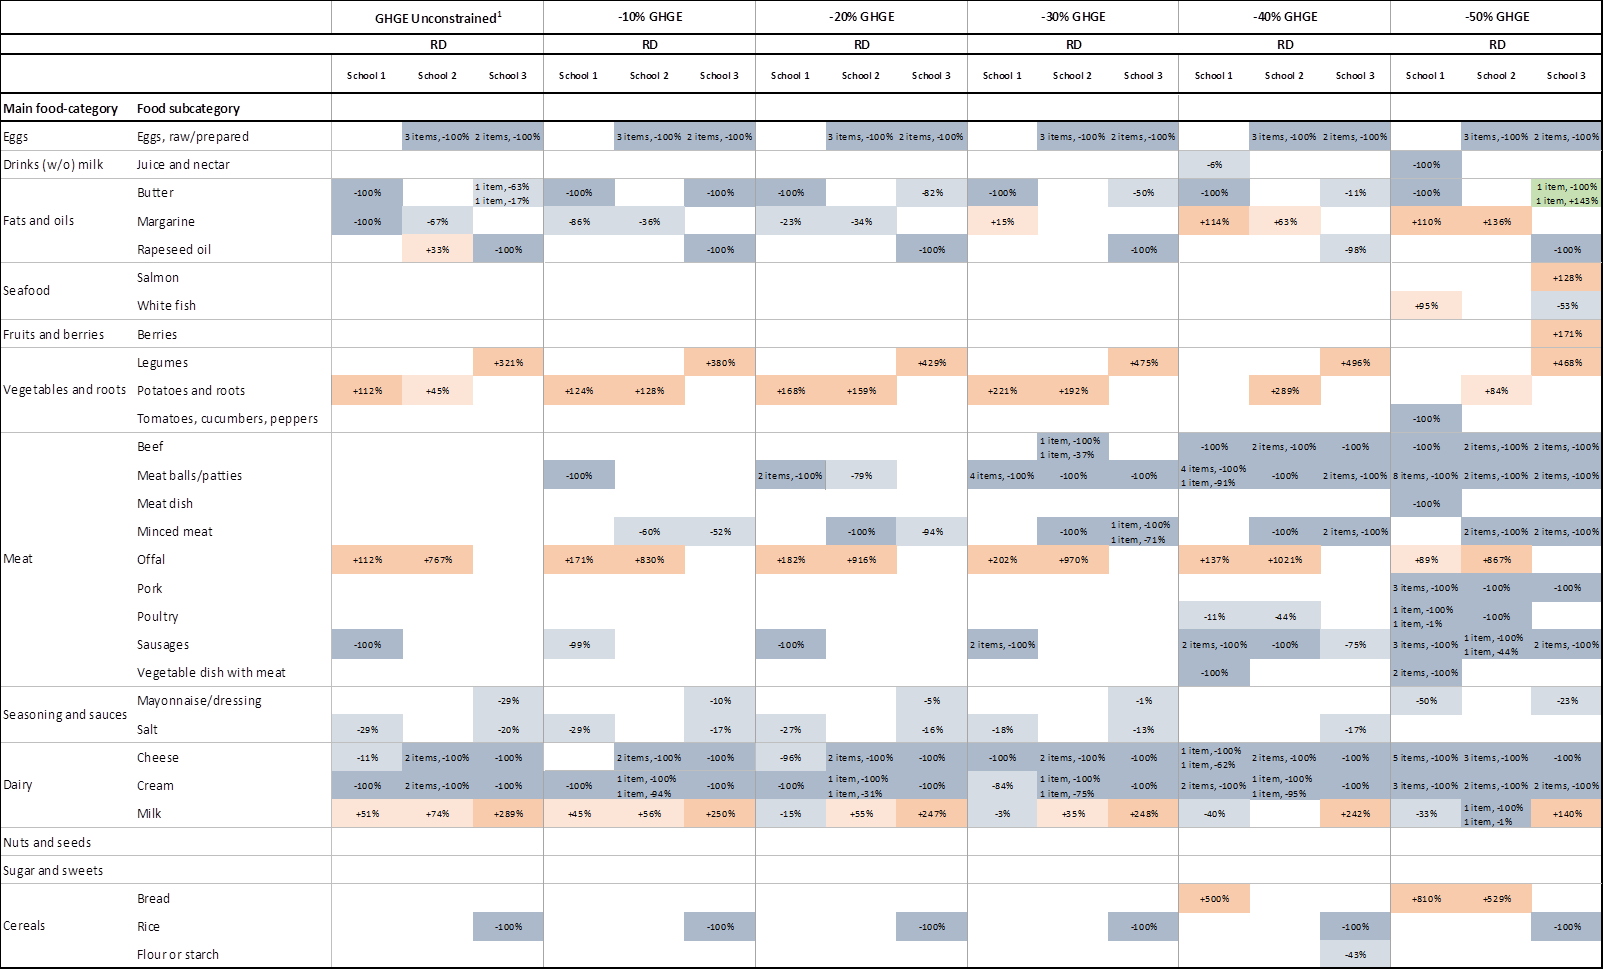


1 No constraint on maximum allowed amount of GHGE (CO2eq) per meal.

| 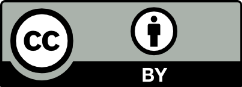 | © 2019 by the authors. Submitted for possible open access publication under the terms and conditions of the Creative Commons Attribution (CC BY) license (http://creativecommons.org/licenses/by/4.0/). |
| --- | --- |
